# Supplementary material for: Sulfonylcalix[4]arene-based Al4 clusters: three aluminum oxo clusters with different coordinated solvents for the CO2 cycloaddition reaction
Source: Royal Society of Chemistry journal article supplement (doi:10.1039/d4qi02096k), 2024-01-01
Supplement: d4qi02096k1.pdf [file d4qi02096k1.pdf]

## Supporting Information (SI)

# **Sulfonylcalix[4]arene-based Al<sub>4</sub> clusters: three aluminum oxo clusters with different coordinated solvents for the CO<sub>2</sub> cycloaddition reaction**

Xiao-Jie Liu, Long-Xue Guo, Wei Xu, Ya-Wen Wang, Yuan-Hang Tian, Li-Xing Zhao, Xiao-Yu Li\*, Jin-Hua Li\*, and Guo-Ming Wang

College of Chemistry and Chemical Engineering, Qingdao University, Shandong 266071, P. R. China

Email: xylichem@qdu.edu.cn; jinhuali1978@163.com

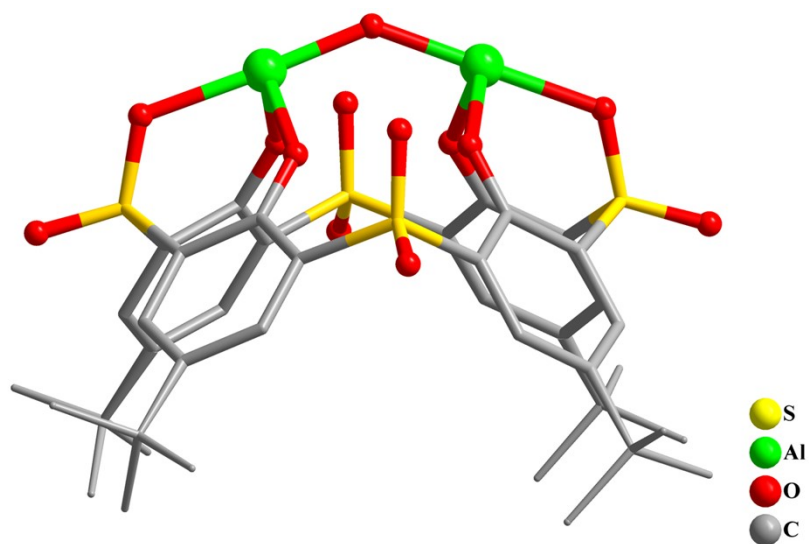

**Fig. S1** The coordination modes of BTC4A-SO<sub>2</sub><sup>4-</sup> ligand.

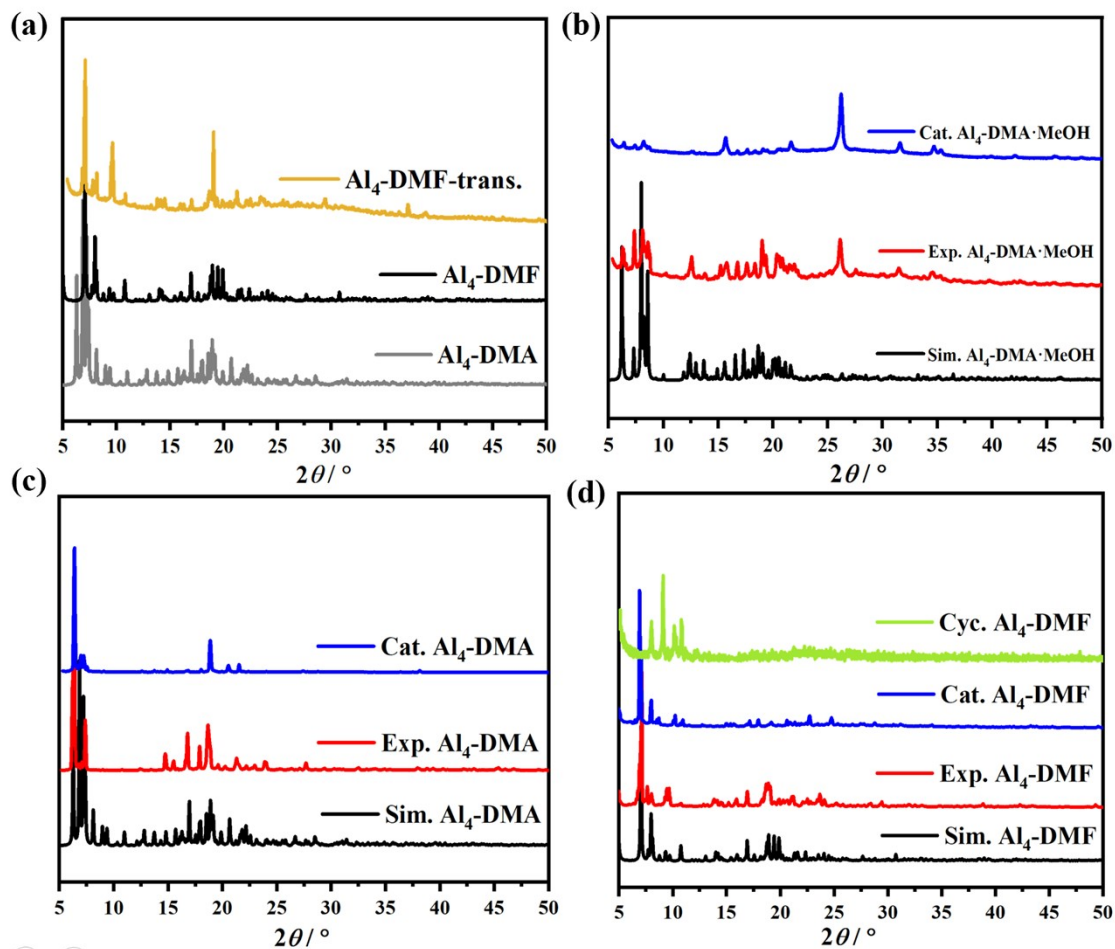

**Fig. S2** The conversion powder from  $\text{Al}_4\text{-DMA}$  to  $\text{Al}_4\text{-DMF}$  (a), the simulated, experimental and catalyzed PXR of  $\text{Al}_4\text{-DMA}\cdot\text{MeOH}$  (b),  $\text{Al}_4\text{-DMA}$  (c), and simulated, experimental, catalyzed and cyclic PXR of  $\text{Al}_4\text{-DMF}$  (d).

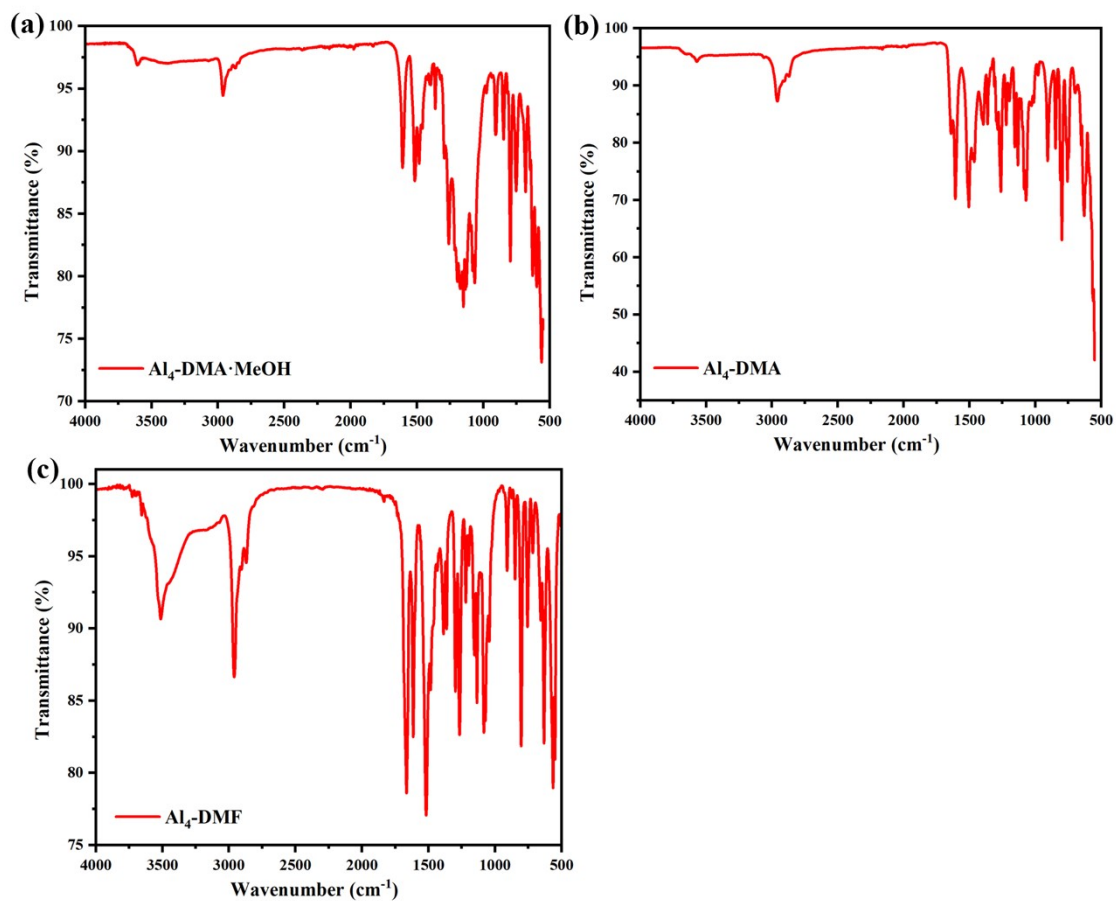

**Fig. S3** The IR spectra of Al<sub>4</sub>-DMA·MeOH (a), Al<sub>4</sub>-DMF (b) and Al<sub>4</sub>-DMA (c).

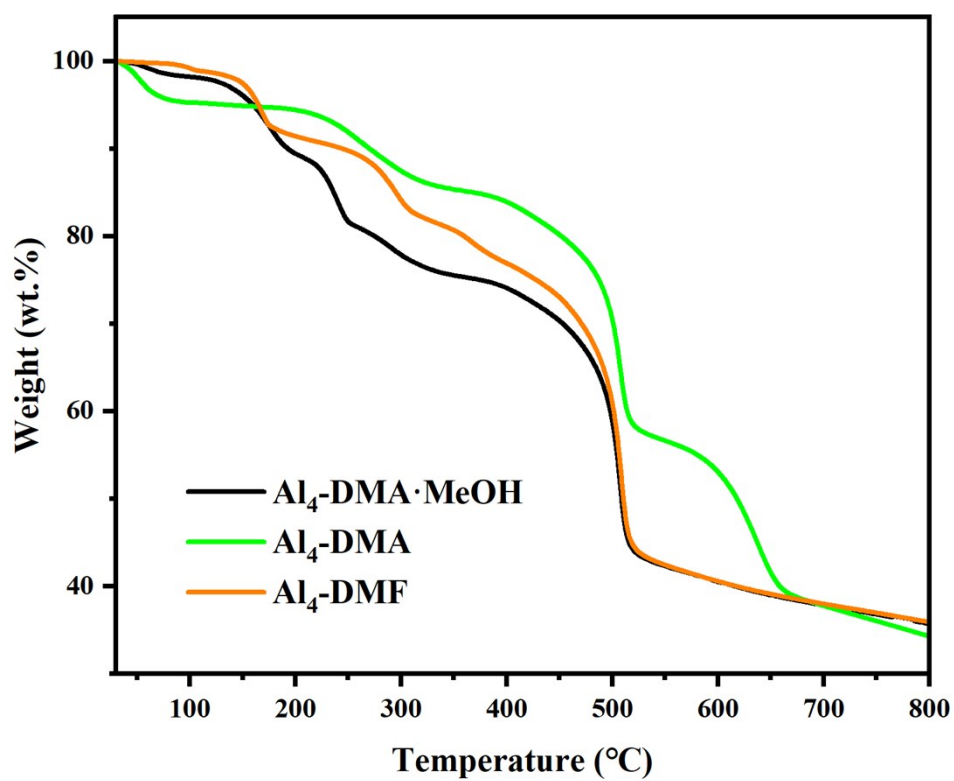

**Fig. S4** The TGA of Al<sub>4</sub>-DMA·MeOH, Al<sub>4</sub>-DMA and Al<sub>4</sub>-DMF.

**Table S1.** The formulas assignment of **Al<sub>4</sub>-DMA·MeOH**, **Al<sub>4</sub>-DMA** and **Al<sub>4</sub>-DMF** in CHCl<sub>3</sub>.

| Species                        | Peak assignment                                                 | Exp. <i>m/z</i> | Sim. <i>m/z</i> |
|--------------------------------|-----------------------------------------------------------------|-----------------|-----------------|
| <b>Al<sub>4</sub>-DMA·MeOH</b> |                                                                 |                 |                 |
| 1a                             | $[(Al)_4(OH)_3(BTC_4A-SO_2)_2(MeO)_2]^-$                        | 1909.30         | 1909.31         |
| 1b                             | $[(Al)_4(OH)_3(BTC_4A-SO_2)_2(MeO)_2(MeOH)_1(H_2O)_1]^-$        | 1959.24         | 1959.35         |
| 1c                             | $[(Al)_4(OH)_3(BTC_4A-SO_2)_2(MeO)_2(MeOH)_1(H_2O)_2]^-$        | 1977.25         | 1977.36         |
| 1d                             | $[(Al)_4(OH)_3(BTC_4A-SO_2)_2(MeO)_2(MeOH)_2(H_2O)_1]^-$        | 1991.27         | 1991.38         |
| 1e                             | $[(Al)_4(OH)_3(BTC_4A-SO_2)_2(MeO)_2(DMA)_1(MeOH)_1(H_2O)_1]^-$ | 2047.30         | 2047.42         |
| <b>Al<sub>4</sub>-DMA</b>      |                                                                 |                 |                 |
| 2a                             | $[(Al)_4(OH)_4(BTC_4A-SO_2)_2(DMA)_3(H_2O)_7(Cl)_1]^-$          | 2288.55         | 2288.53         |
| <b>Al<sub>4</sub>-DMF</b>      |                                                                 |                 |                 |
| 3a                             | $[(Al)_4(OH)_5(BTC_4A-SO_2)_2(H_2O)_1]^-$                       | 1899.26         | 1899.29         |
| 3b                             | $[(Al)_4(OH)_5(BTC_4A-SO_2)_2(^nPrOH)_1]^-$                     | 1941.25         | 1941.34         |
| 3c                             | $[(Al)_4(OH)_5(BTC_4A-SO_2)_2(^nPrOH)_1(H_2O)_1]^-$             | 1959.24         | 1959.35         |
| 3d                             | $[(Al)_4(OH)_5(BTC_4A-SO_2)_2(^nPrOH)_1(H_2O)_2]^-$             | 1977.25         | 1977.36         |
| 3e                             | $[(Al)_4(OH)_5(BTC_4A-SO_2)_2(DMF)_1(^nPrOH)_1(H_2O)_2]^-$      | 2051.31         | 2051.42         |

**Table S2.** The effect of temperature, pressure and time on cycloaddition of CO<sub>2</sub> catalyzed by Al<sub>4</sub>-DMF was studied.

| Entry | T [°C] | P [MPa] | Time [h] | Yield of Al <sub>4</sub> -DMF (%) |
|-------|--------|---------|----------|-----------------------------------|
| 1     | 80     | 0.1     | 4        | 83                                |
| 2     | 80     | 0.5     | 4        | 99                                |
| 3     | 80     | 1       | 4        | 99                                |
| 4     | 80     | 2       | 4        | 99                                |
| 5     | 70     | 0.5     | 4        | 85                                |
| 6     | 60     | 0.5     | 4        | 77                                |
| 7     | 80     | 0.5     | 3        | 62                                |
| 8     | 80     | 0.5     | 4        | 99                                |
| 9     | 80     | 0.5     | 5        | 99                                |

Reaction conditions: epichlorohydrin (5.0 mmol), Al<sub>4</sub>-DMF (0.01 mol%), <sup>n</sup>Bu<sub>4</sub>NBr (3 mol%) solvent free.

**Table S3.** The effects of the amount of catalyst and cocatalyst and the synthesis material of Al<sub>4</sub>-DMF cluster on the cycloaddition reaction of CO<sub>2</sub> catalyzed by Al<sub>4</sub>-DMF were studied.

| Entry | <sup>n</sup> Bu <sub>4</sub> NBr | Al <sub>4</sub> -DMF                                                                    | Yield of Al <sub>4</sub> -DMF (%) |
|-------|----------------------------------|-----------------------------------------------------------------------------------------|-----------------------------------|
| 1     | 1 mol%                           | 0.01 mol%                                                                               | 58                                |
| 2     | 3 mol%                           | 0.01 mol%                                                                               | 99                                |
| 3     | 5 mol%                           | 0.01 mol%                                                                               | 99                                |
| 4     | 3 mol%                           | 0                                                                                       | 71                                |
| 5     | 3 mol%                           | 0.03 mol%                                                                               | 99                                |
| 6     | 3 mol%                           | 0.05 mol%                                                                               | 99                                |
| 7     | 3 mol%                           | H <sub>4</sub> BTC <sub>4</sub> A-SO <sub>2</sub> +AlCl <sub>3</sub> ·6H <sub>2</sub> O | 78                                |
| 8     | 3 mol%                           | DMA                                                                                     | 73                                |
| 9     | 3 mol%                           | DMF                                                                                     | 72                                |

Reaction conditions: epichlorohydrin (5.0 mmol), CO<sub>2</sub> (0.5 MPa), temperature (80 °C), time (4 h), solvent free.

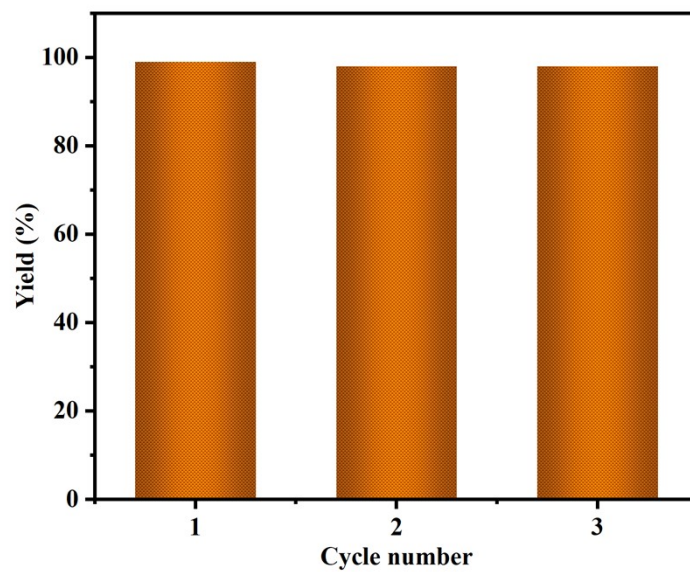

**Fig. S5** Recyclability experiments for catalytic activities of  $\text{Al}_4\text{-DMF}$  in cycloaddition reaction.



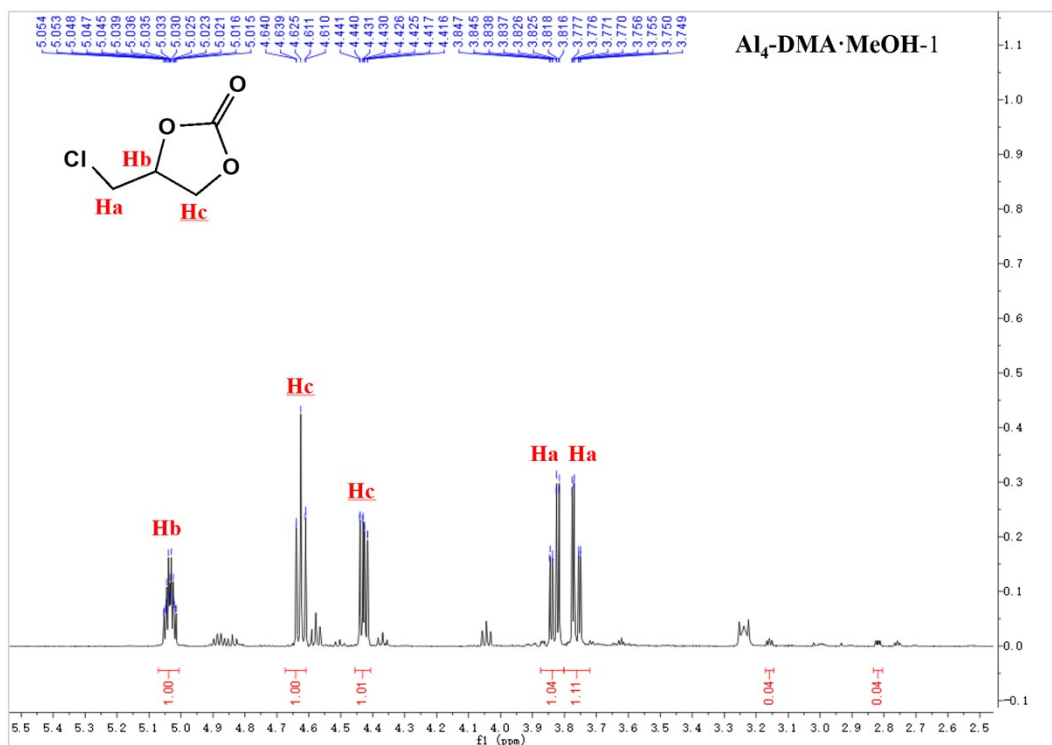

**Fig. S6** <sup>1</sup>HNMR spectrum of Al<sub>4</sub>-DMA·MeOH-1 catalyzed oxidation products of epichlorohydrin (400 MHz, CDCl<sub>3</sub>, 298 K).

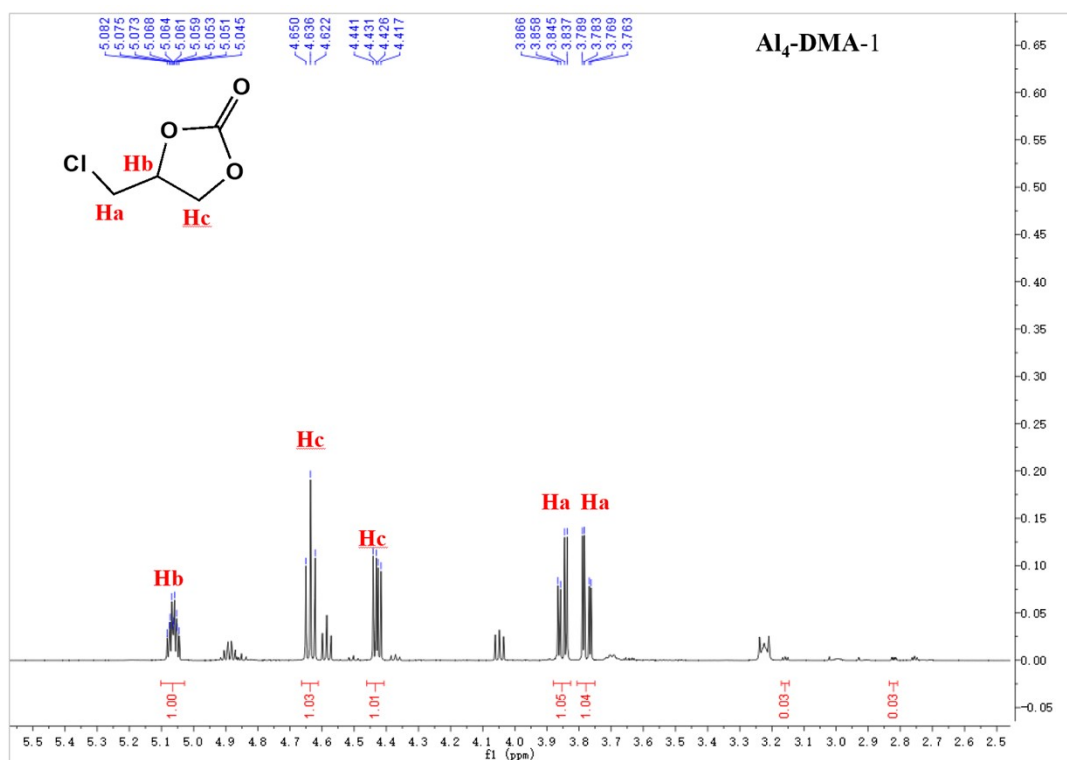

**Fig. S7** <sup>1</sup>HNMR spectrum of Al<sub>4</sub>-DMA-1 catalyzed oxidation products of epichlorohydrin (400 MHz, CDCl<sub>3</sub>, 298 K).

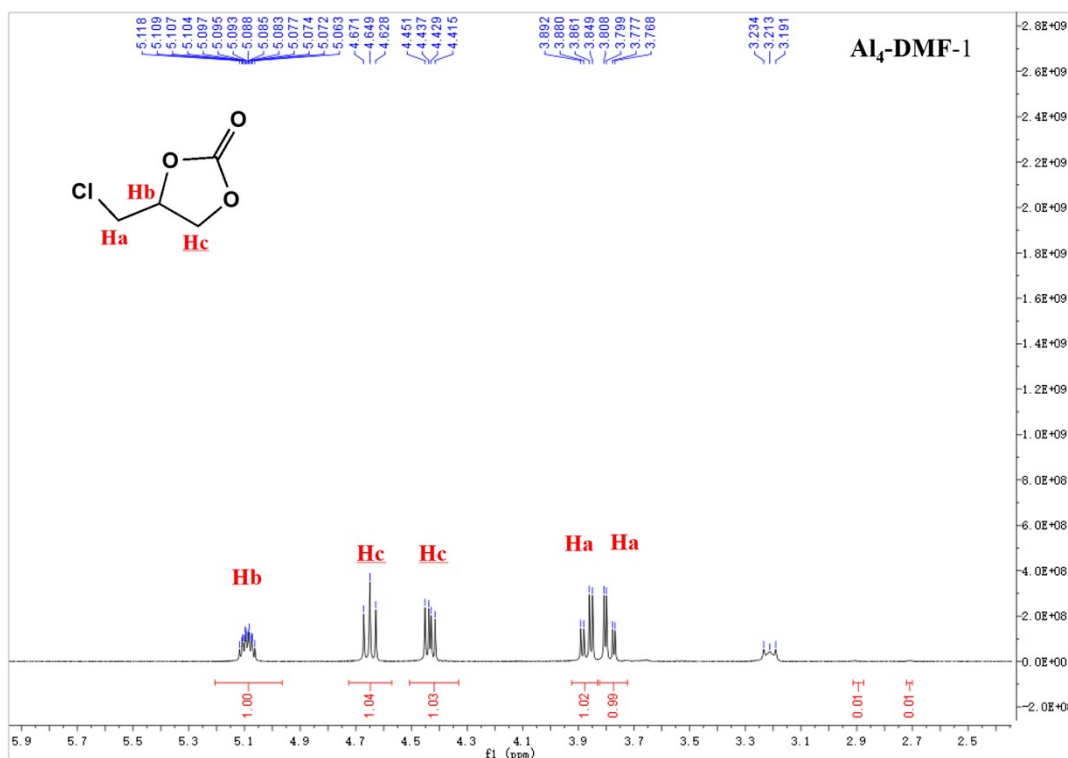

**Fig. S8** <sup>1</sup>H NMR spectrum of Al<sub>4</sub>-DMF-1 catalyzed oxidation products of epichlorohydrin (400 MHz, CDCl<sub>3</sub>, 298 K).

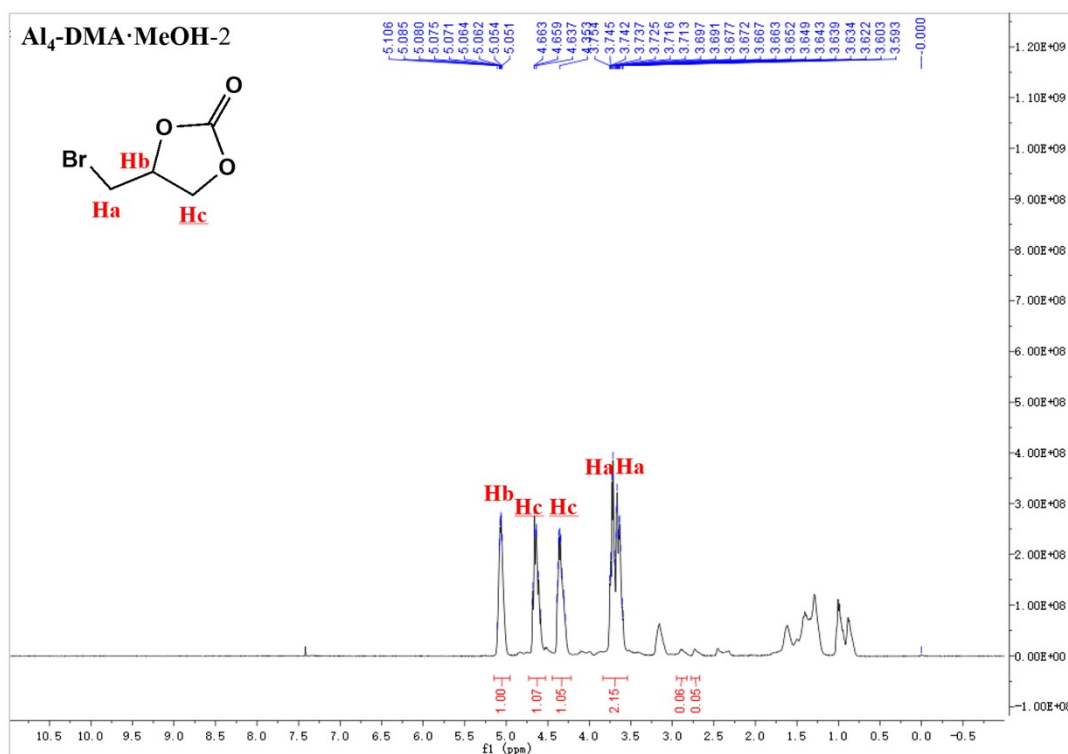

**Fig. S9** <sup>1</sup>H NMR spectrum of Al<sub>4</sub>-DMA·MeOH-2 catalyzed oxidation products of epoxybromopropane (400 MHz, CDCl<sub>3</sub>, 298 K).

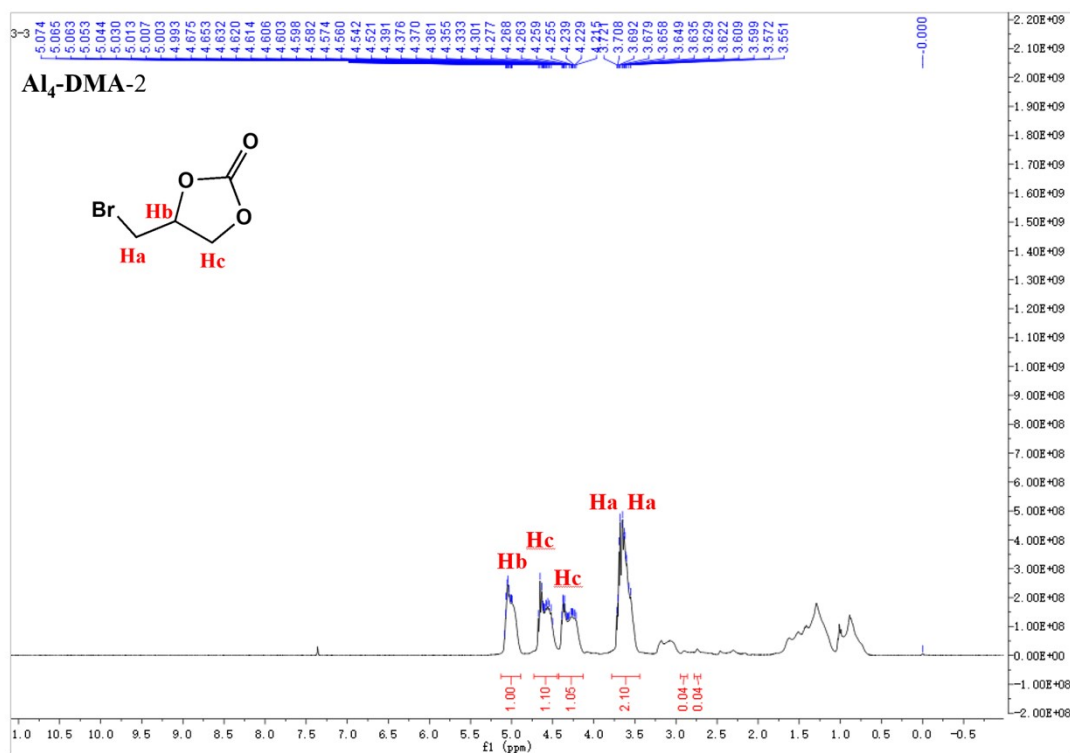

**Fig. S10** <sup>1</sup>HNMR spectrum of Al<sub>4</sub>-DMA-2 catalyzed oxidation products of epoxybromopropane (400 MHz, CDCl<sub>3</sub>, 298 K).

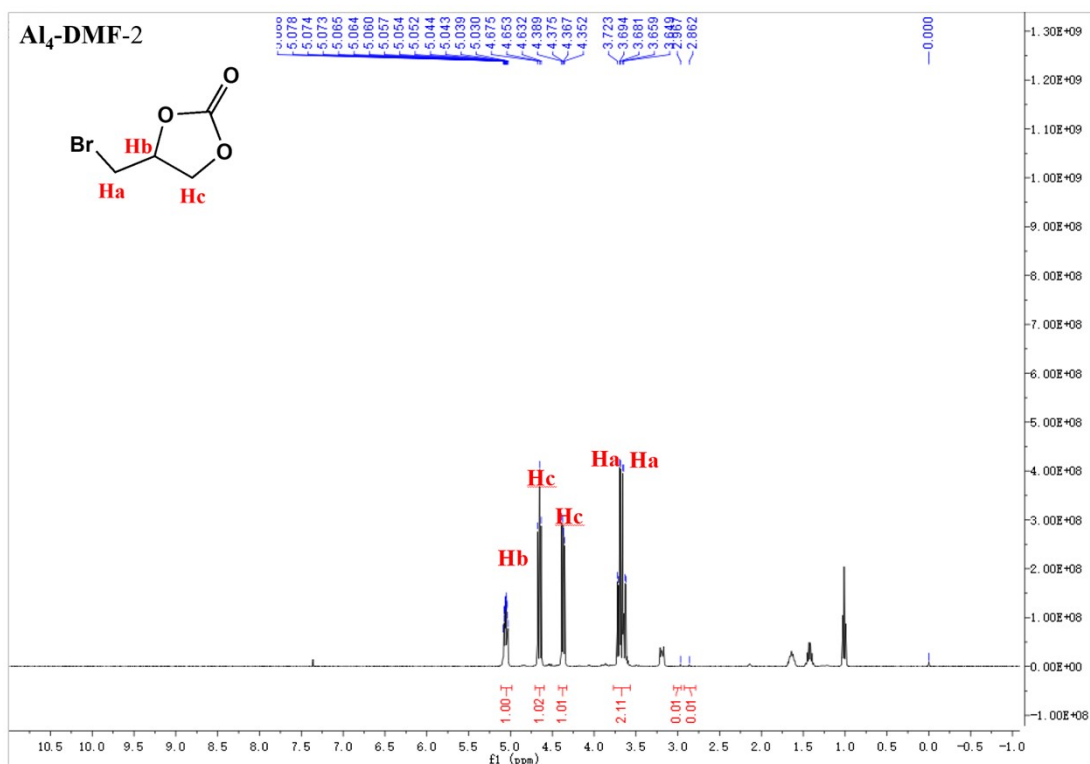

**Fig. S11** <sup>1</sup>HNMR spectrum of Al<sub>4</sub>-DMF-2 catalyzed oxidation products of epoxybromopropane (400 MHz, CDCl<sub>3</sub>, 298 K).

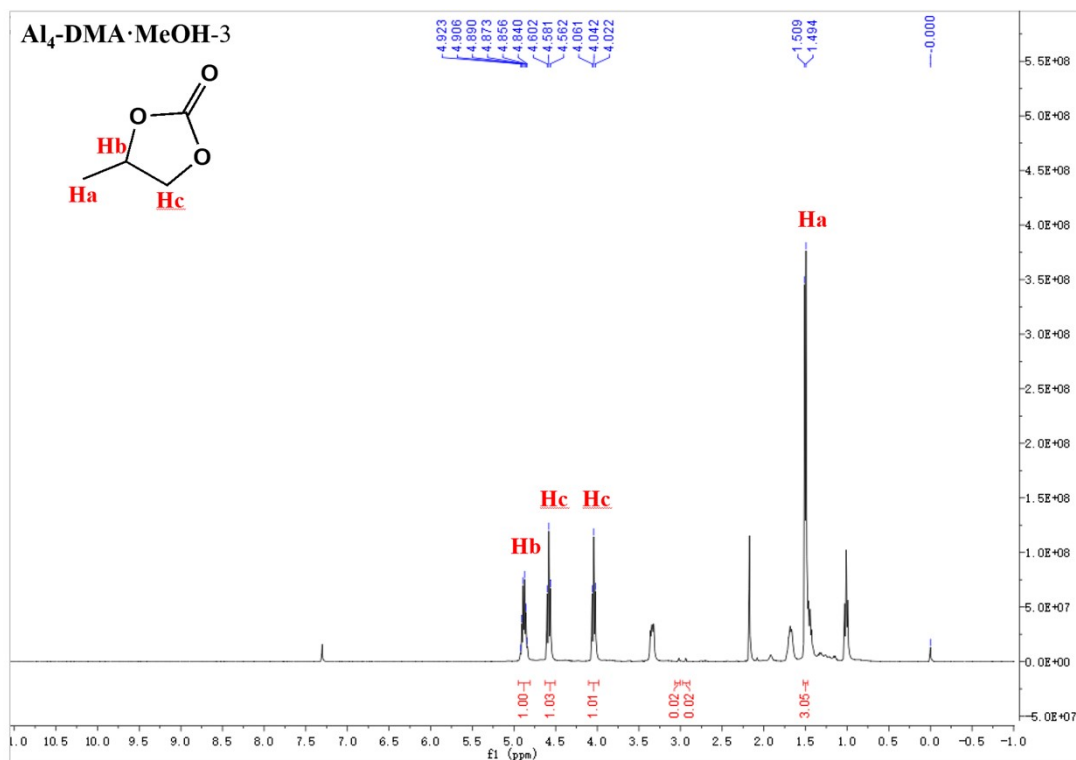

**Fig. S12** <sup>1</sup>H NMR spectrum of Al<sub>4</sub>-DMA·MeOH-3 catalyzed oxidation products of ethylene oxide (400 MHz, CDCl<sub>3</sub>, 298 K).

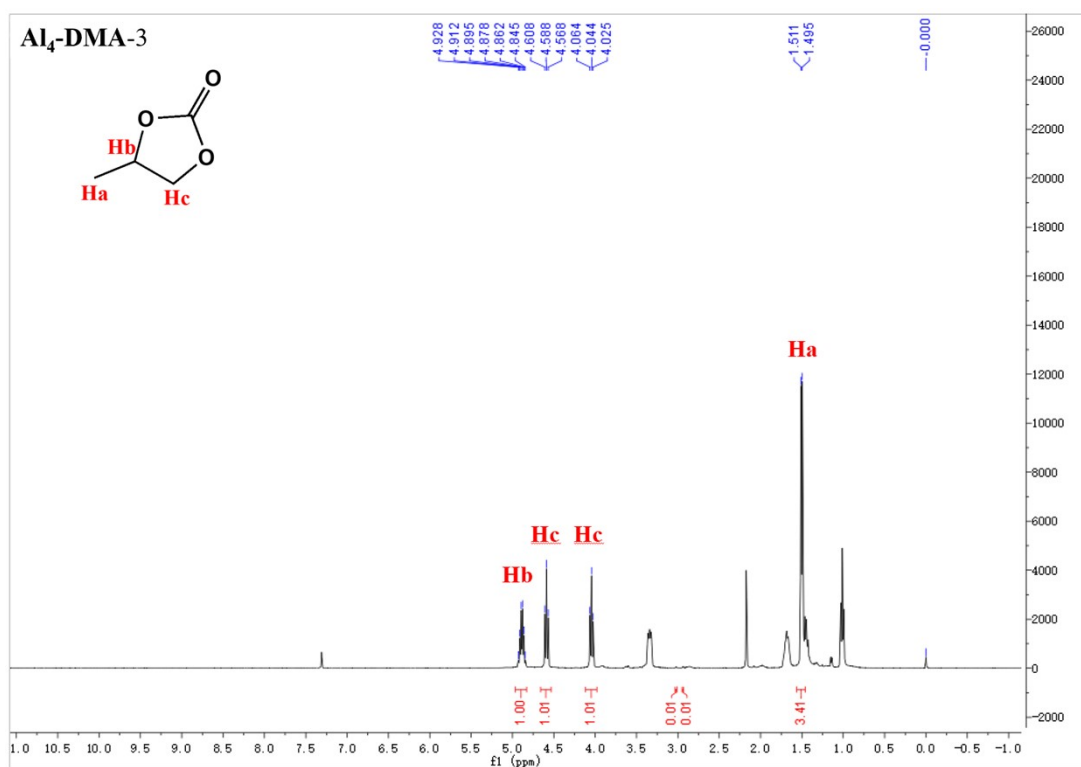

**Fig. S13** <sup>1</sup>H NMR spectrum of Al<sub>4</sub>-DMA-3 catalyzed oxidation products of ethylene oxide (400 MHz, CDCl<sub>3</sub>, 298 K).

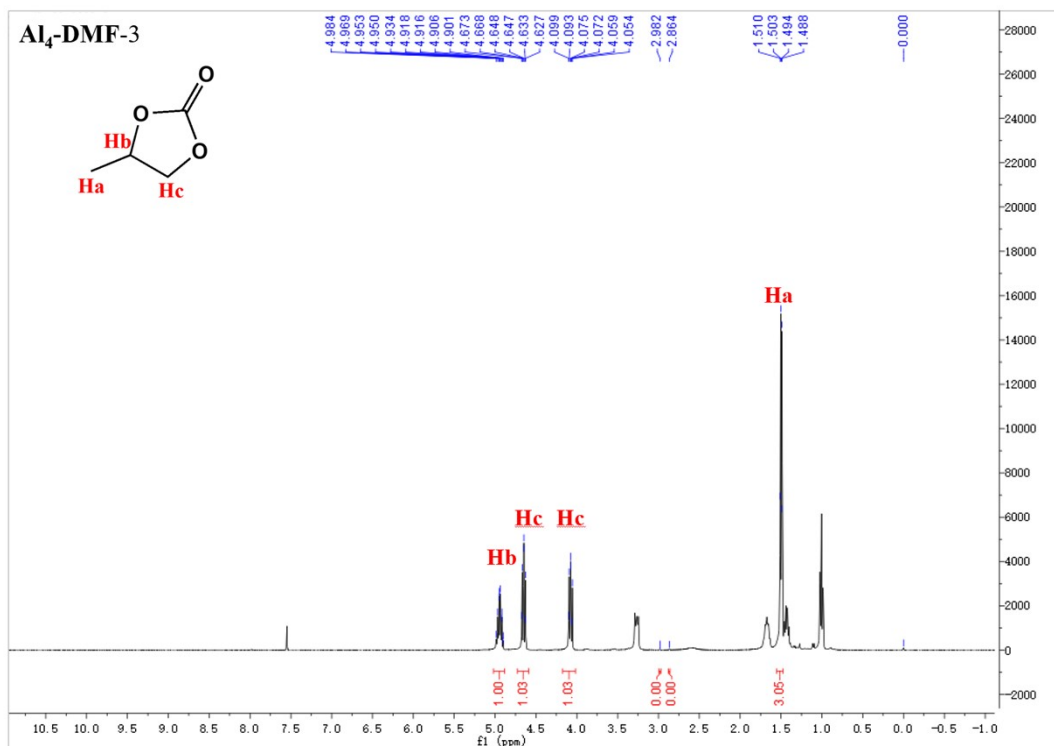

**Fig. S14** <sup>1</sup>H NMR spectrum of Al<sub>4</sub>-DMF-3 catalyzed oxidation products of ethylene oxide (400 MHz, CDCl<sub>3</sub>, 298 K).

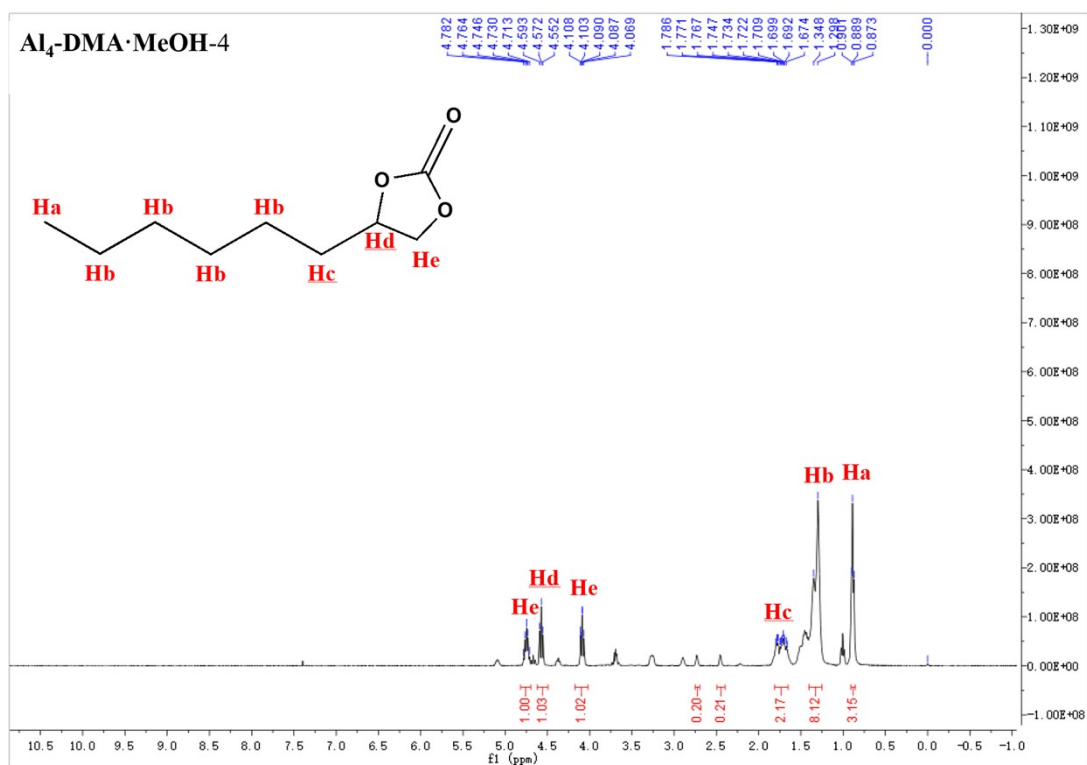

**Fig. S15** <sup>1</sup>H NMR spectrum of Al<sub>4</sub>-DMA·MeOH-4 catalyzed oxidation products of octane oxide (400 MHz, CDCl<sub>3</sub>, 298 K).

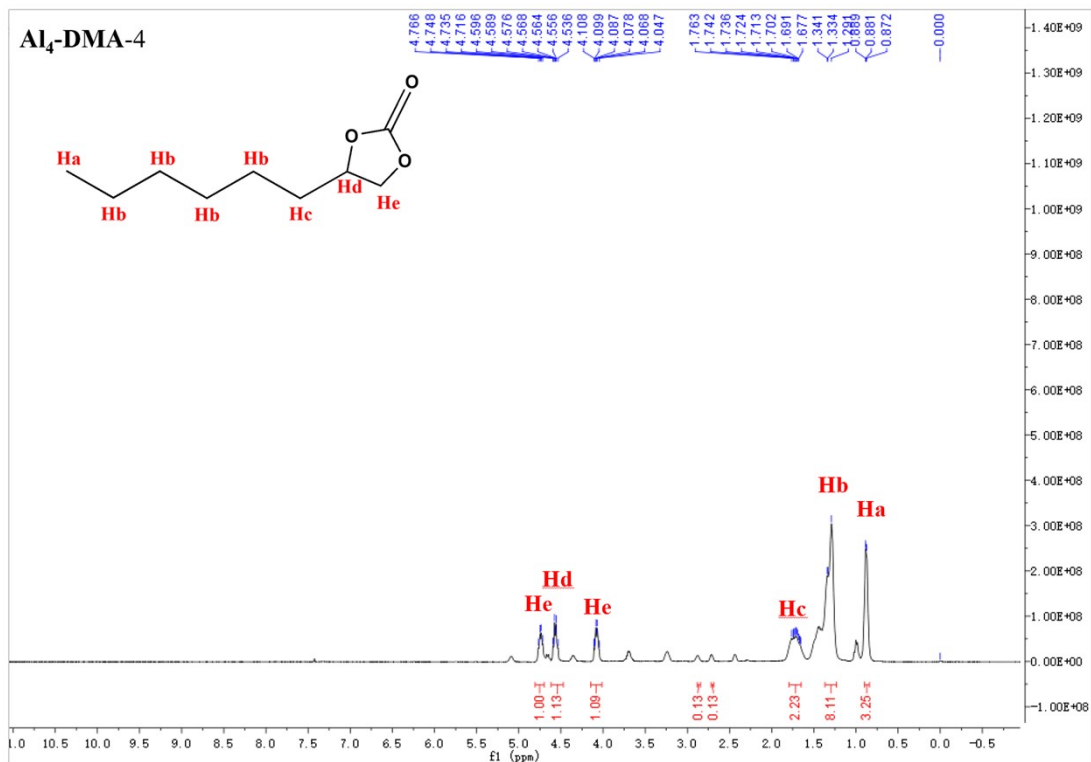

**Fig. S16** <sup>1</sup>H NMR spectrum of Al<sub>4</sub>-DMA-4 catalyzed oxidation products of octane oxide (400 MHz, CDCl<sub>3</sub>, 298 K).

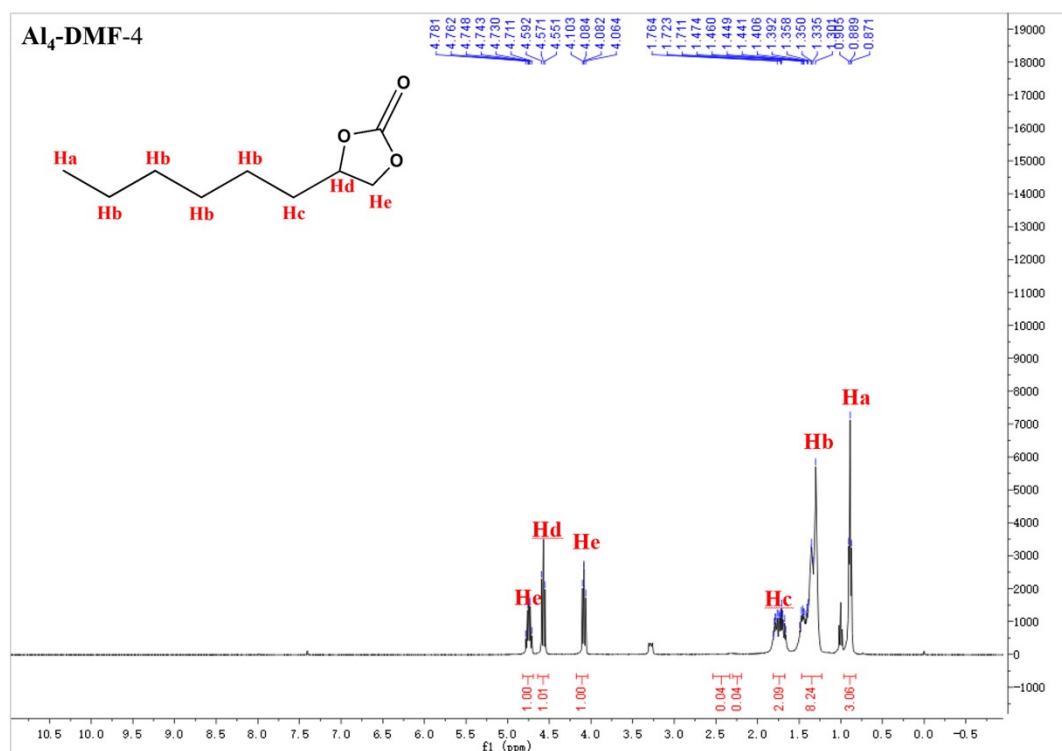

**Fig. S17** <sup>1</sup>H NMR spectrum of Al<sub>4</sub>-DMF-4 catalyzed oxidation products of octane oxide (400 MHz, CDCl<sub>3</sub>, 298 K).

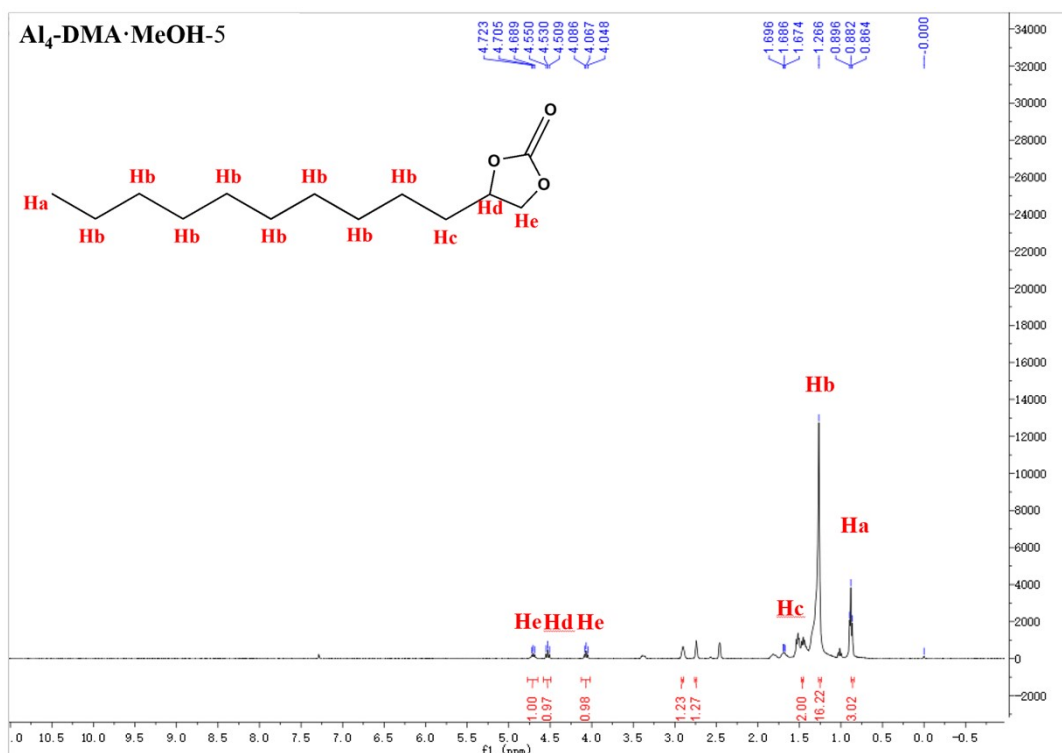

**Fig. S18** <sup>1</sup>H NMR spectrum of Al<sub>4</sub>-DMA·MeOH-5 catalyzed oxidation products of dodecane oxide (400 MHz, CDCl<sub>3</sub>, 298 K).

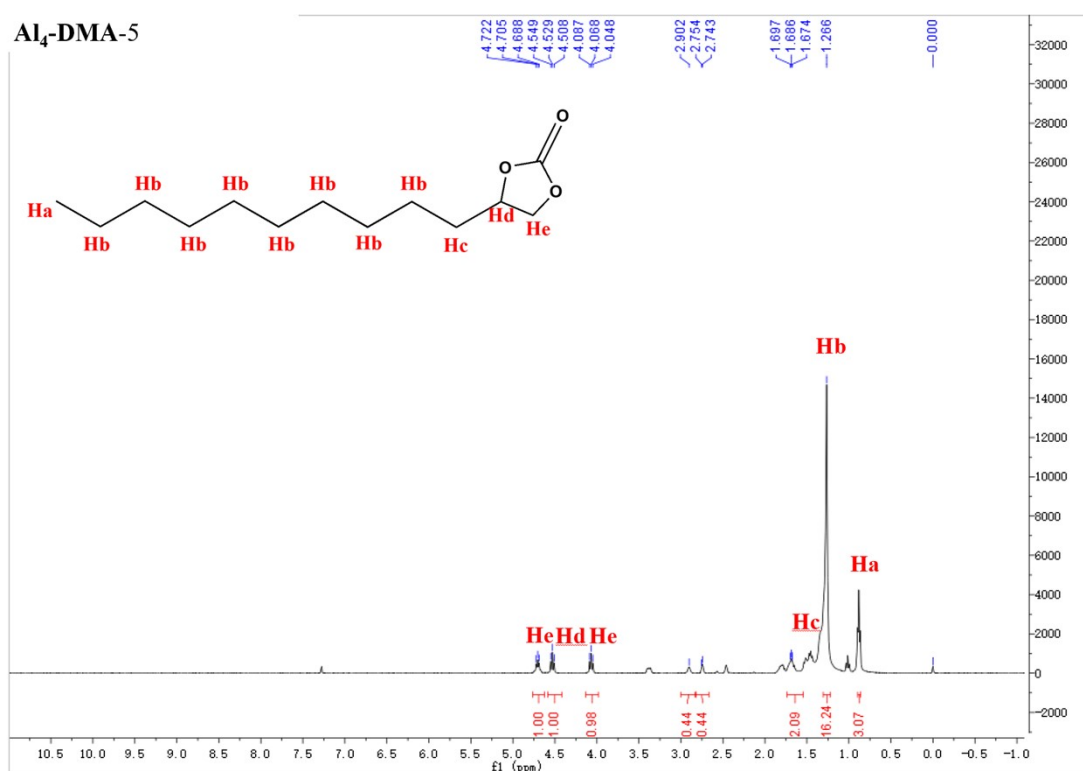

**Fig. S19** <sup>1</sup>H NMR spectrum of Al<sub>4</sub>-DMA-5 catalyzed oxidation products of dodecane oxide (400 MHz, CDCl<sub>3</sub>, 298 K).

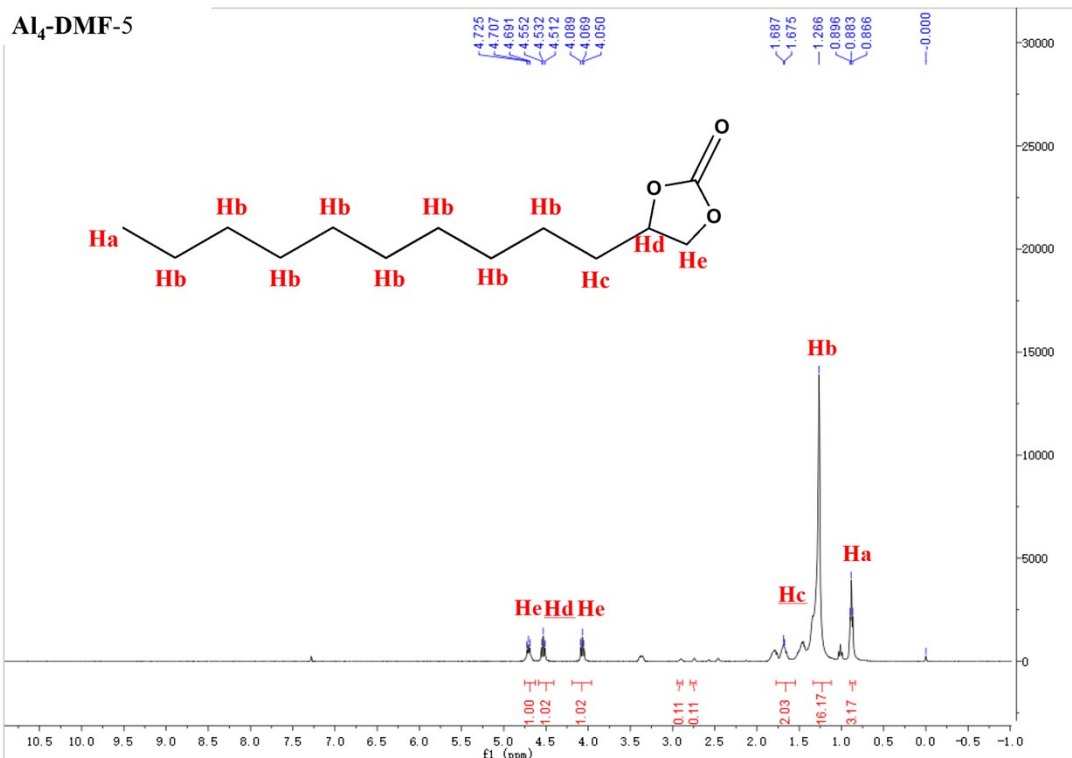

**Fig. S20** <sup>1</sup>HNMR spectrum of Al<sub>4</sub>-DMF-5 catalyzed oxidation products of dodecane oxide (400 MHz, CDCl<sub>3</sub>, 298 K).

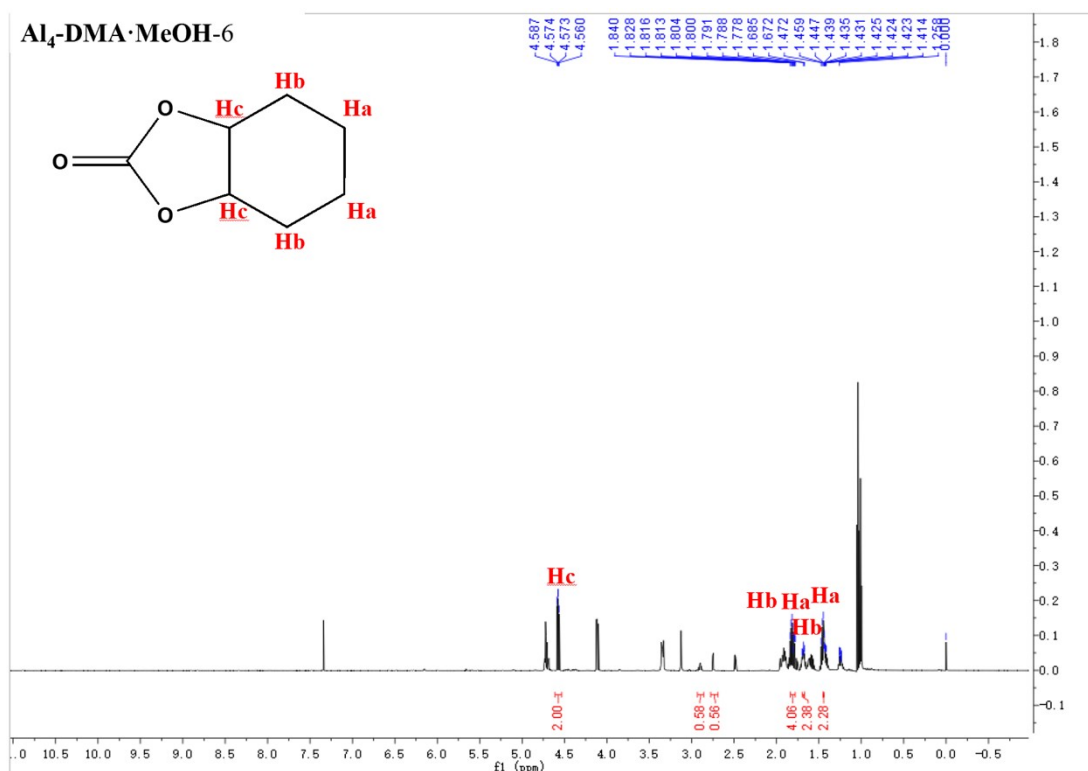

**Fig. S21** <sup>1</sup>HNMR spectrum of Al<sub>4</sub>-DMA·MeOH-6 catalyzed oxidation products of cyclohexane oxide (400 MHz, CDCl<sub>3</sub>, 298 K).



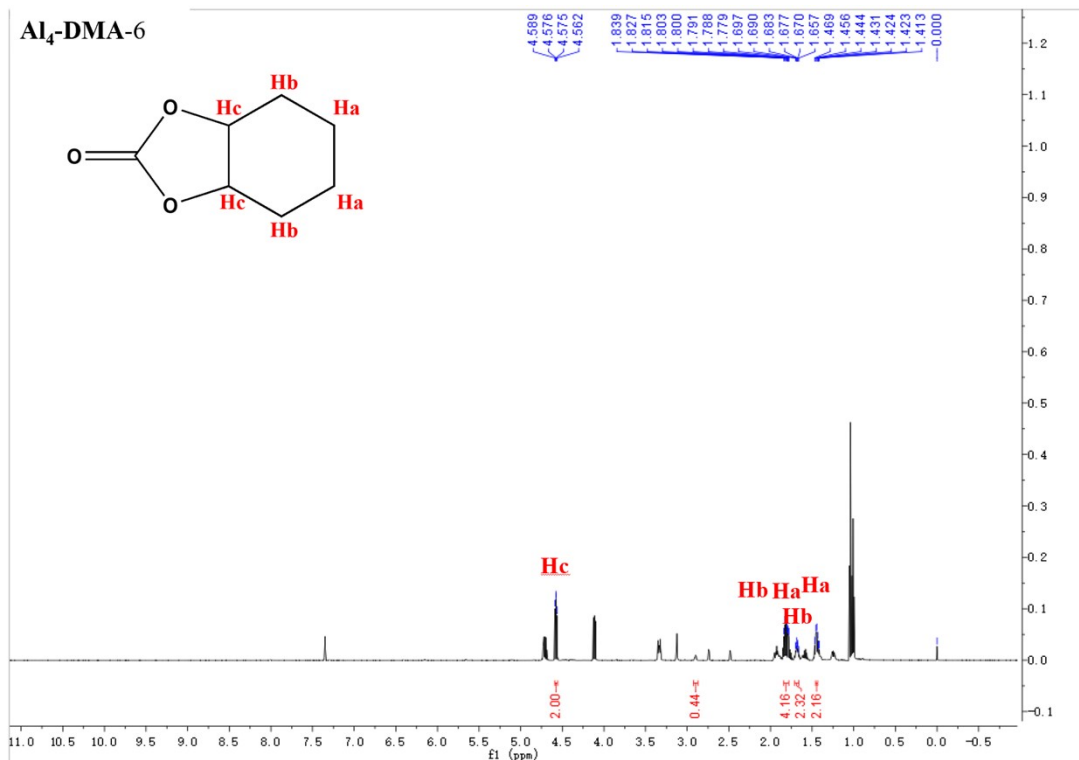

**Fig. S22** <sup>1</sup>H NMR spectrum of Al<sub>4</sub>-DMA-6 catalyzed oxidation products of cyclohexane oxide (400 MHz, CDCl<sub>3</sub>, 298 K).

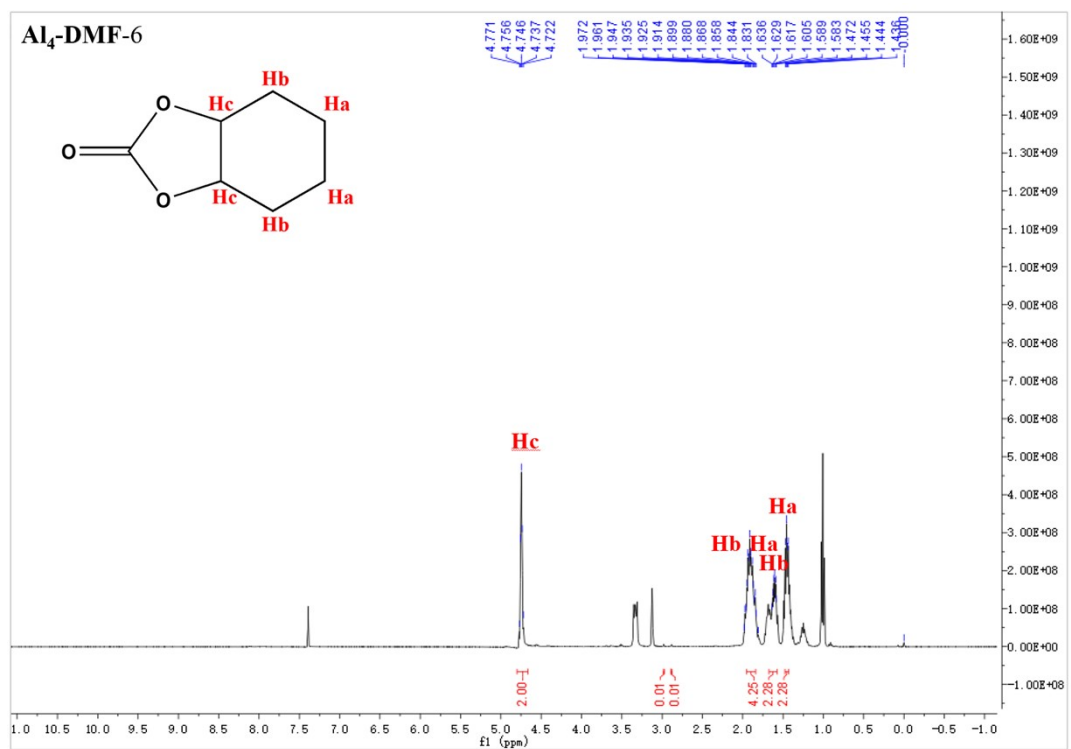

**Fig. S23** <sup>1</sup>H NMR spectrum of Al<sub>4</sub>-DMF-6 catalyzed oxidation products of cyclohexane oxide (400 MHz, CDCl<sub>3</sub>, 298 K).

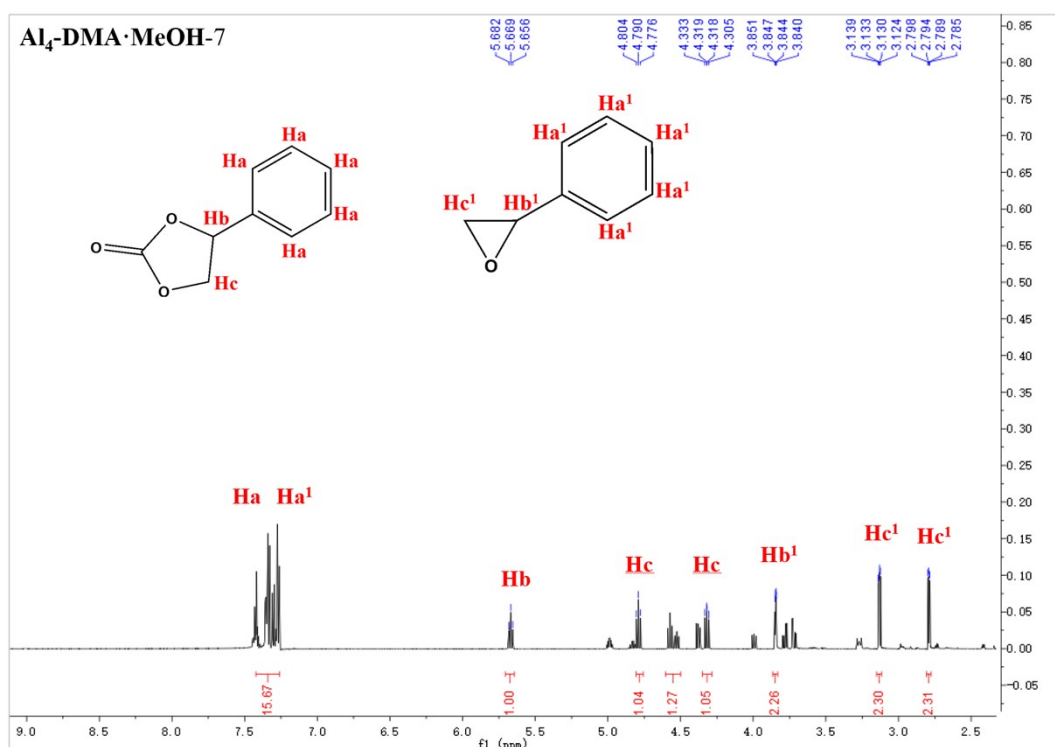

**Fig. S24** <sup>1</sup>H NMR spectrum of Al<sub>4</sub>-DMA·MeOH-7 catalyzed oxidation products of (R)-styrene oxide (400 MHz, CDCl<sub>3</sub>, 298 K).

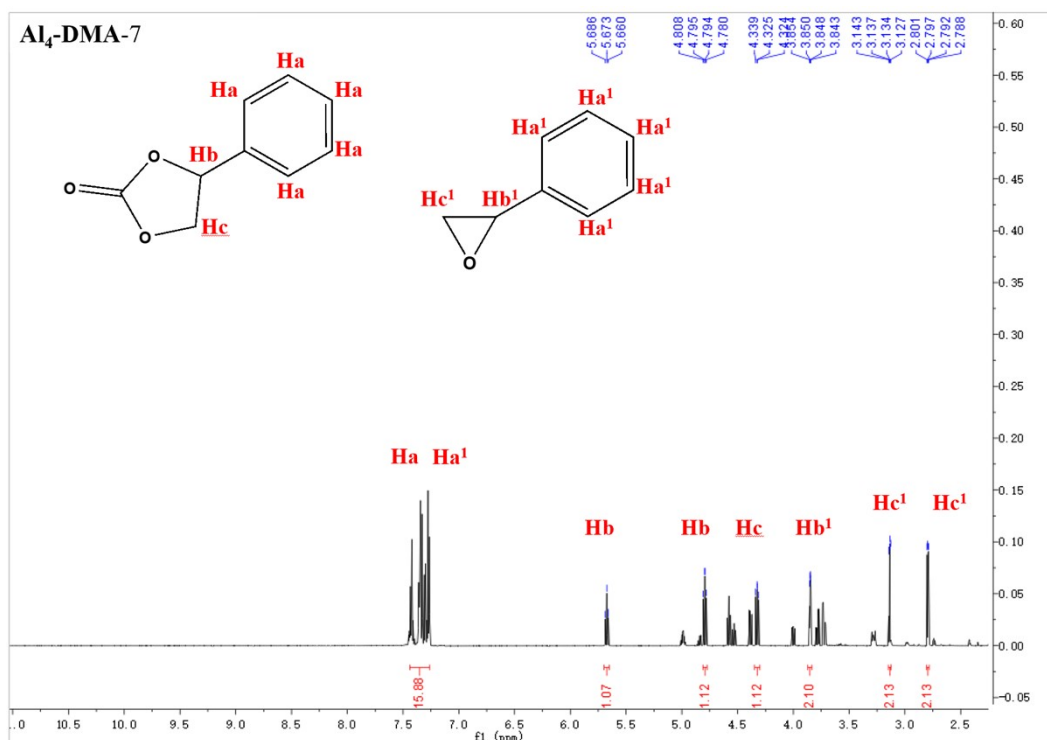

**Fig. S25** <sup>1</sup>H NMR spectrum of Al<sub>4</sub>-DMA-7 catalyzed oxidation products of (R)-styrene oxide (400 MHz, CDCl<sub>3</sub>, 298 K).

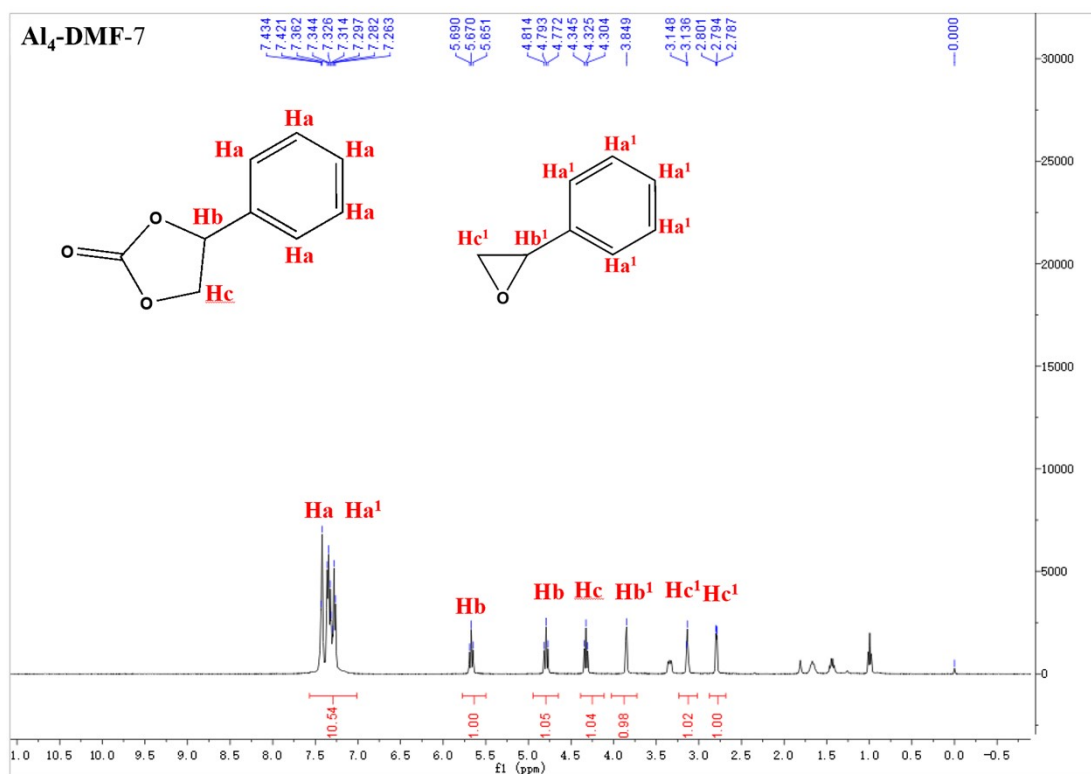

**Fig. S26** <sup>1</sup>H NMR spectrum of Al<sub>4</sub>-DMF-7 catalyzed oxidation products of (R)-styrene oxide (400 MHz, CDCl<sub>3</sub>, 298 K).

**Table S4.** Crystal data for **Al<sub>4</sub>-DMA·MeOH**, **Al<sub>4</sub>-DMA** and **Al<sub>4</sub>-DMF**.

| Identification code                   | <b>Al<sub>4</sub>-DMA·MeOH</b>                                                                 | <b>Al<sub>4</sub>-DMA</b>                                                                      | <b>Al<sub>4</sub>-DMF</b>                                                                      |
|---------------------------------------|------------------------------------------------------------------------------------------------|------------------------------------------------------------------------------------------------|------------------------------------------------------------------------------------------------|
| Empirical formula                     | C <sub>96</sub> H <sub>122</sub> Al <sub>4</sub> N <sub>2</sub> O <sub>32</sub> S <sub>8</sub> | C <sub>96</sub> H <sub>128</sub> Al <sub>4</sub> N <sub>4</sub> O <sub>32</sub> S <sub>8</sub> | C <sub>92</sub> H <sub>120</sub> Al <sub>4</sub> N <sub>4</sub> O <sub>32</sub> S <sub>8</sub> |
| Formula weight                        | 2132.31                                                                                        | 2214.42                                                                                        | 2158.31                                                                                        |
| Temperature/K                         | 99.98(10)                                                                                      | 100.00(10)                                                                                     | 150.01(10)                                                                                     |
| Crystal system                        | monoclinic                                                                                     | monoclinic                                                                                     | triclinic                                                                                      |
| Space group                           | <i>C</i> <sub>2</sub> / <i>c</i>                                                               | <i>P</i> <sub>21</sub> / <i>n</i>                                                              | <i>P</i> -1                                                                                    |
| <i>a</i> /Å                           | 23.4383(6)                                                                                     | 15.3971(2)                                                                                     | 12.04380(10)                                                                                   |
| <i>b</i> /Å                           | 18.9600(2)                                                                                     | 23.9137(2)                                                                                     | 13.38600(10)                                                                                   |
| <i>c</i> /Å                           | 27.5046(6)                                                                                     | 17.5318(2)                                                                                     | 19.3391(2)                                                                                     |
| $\alpha$ /°                           | 90                                                                                             | 90                                                                                             | 95.7660(10)                                                                                    |
| $\beta$ /°                            | 118.351(3)                                                                                     | 96.7090(10)                                                                                    | 106.3040(10)                                                                                   |
| $\gamma$ /°                           | 90                                                                                             | 90                                                                                             | 107.2180(10)                                                                                   |
| Volume/Å <sup>3</sup>                 | 10756.7(5)                                                                                     | 6411.03(12)                                                                                    | 2800.45(5)                                                                                     |
| <i>Z</i>                              | 4                                                                                              | 2                                                                                              | 1                                                                                              |
| $\rho_{\text{calc}}$ /cm <sup>3</sup> | 1.317                                                                                          | 1.147                                                                                          | 1.280                                                                                          |
| $\mu$ /mm <sup>-1</sup>               | 2.494                                                                                          | 2.114                                                                                          | 2.407                                                                                          |
| F(000)                                | 4496.0                                                                                         | 2336.0                                                                                         | 1136.0                                                                                         |
| Radiation                             | Cu K $\alpha$<br>( $\lambda$ = 1.54184)                                                        | Cu K $\alpha$<br>( $\lambda$ = 1.54184)                                                        | Cu K $\alpha$<br>( $\lambda$ = 1.54184)                                                        |
| $2\theta$ range for data collection/° | 6.21 to 142.942                                                                                | 6.28 to 143.428                                                                                | 4.86 to 153.74                                                                                 |
| Index ranges                          | -27 $\leq$ <i>h</i> $\leq$ 28,<br>-23 $\leq$ <i>k</i> $\leq$ 22,                               | -18 $\leq$ <i>h</i> $\leq$ 18,<br>-29 $\leq$ <i>k</i> $\leq$ 29,                               | -15 $\leq$ <i>h</i> $\leq$ 15,<br>-16 $\leq$ <i>k</i> $\leq$ 16,                               |

|                                                | $-33 \leq l \leq 33$                         | $-21 \leq l \leq 21$                         | $-23 \leq l \leq 24$                      |
|------------------------------------------------|----------------------------------------------|----------------------------------------------|-------------------------------------------|
| Reflections collected                          | 85620                                        | 108525                                       | 37965                                     |
| Independent reflections                        | 10059<br>[Rint = 0.1767,<br>Rsigma = 0.0710] | 12005<br>[Rint = 0.1183,<br>Rsigma = 0.0448] | 11333 [Rint = 0.0822,<br>Rsigma = 0.0640] |
| Data/restraints/parameters                     | 10059/68/641                                 | 12005/59/666                                 | 11333/6/647                               |
| Goodness-of-fit on $F_2$                       | 1.205                                        | 1.042                                        | 1.103                                     |
| Final R indexes [ $I \geq 2\sigma(I)$ ]        | $R_1 = 0.1005,$<br>$wR_2 = 0.2787$           | $R_1 = 0.1025,$<br>$wR_2 = 0.2682$           | $R_1 = 0.0536,$<br>$wR_2 = 0.1504$        |
| Final R indexes [all data]                     | $R_1 = 0.1176,$<br>$wR_2 = 0.3025$           | $R_1 = 0.1178,$<br>$wR_2 = 0.2838$           | $R_1 = 0.0576,$<br>$wR_2 = 0.1544$        |
| Largest diff. peak/hole / $e \text{ \AA}^{-3}$ | 2.09/-1.22                                   | 1.78/-0.83                                   | 0.62/-0.81                                |

**Table S5.** Selected bond distances (Å) and angles (°) for **Al<sub>4</sub>-DMA·MeOH**, **Al<sub>4</sub>-DMA**, and **Al<sub>4</sub>-DMF**.

| <b>Al<sub>4</sub>-DMA·MeOH</b>              |             |              |             |
|---------------------------------------------|-------------|--------------|-------------|
| Al1—O1                                      | 1.836 (3)   | O13—Al1—O11  | 178.36 (14) |
| Al1—O10                                     | 1.812 (3)   | O13—Al1—O14  | 96.19 (14)  |
| Al1—O11                                     | 2.125 (3)   | O13—Al1—O14i | 93.53 (13)  |
| Al1—O13                                     | 1.849 (3)   | O14i—Al1—O11 | 86.34 (12)  |
| Al1—O14                                     | 1.850 (3)   | O14—Al1—O11  | 85.37 (12)  |
| Al1—O14i                                    | 1.870 (3)   | O14—Al1—O14i | 76.94 (12)  |
| Al2—O4                                      | 1.815 (3)   | O4—Al2—O5    | 87.50 (16)  |
| Al2—O5                                      | 1.997 (3)   | O4—Al2—O7    | 92.86 (16)  |
| Al2—O7                                      | 1.854 (4)   | O4—Al2—O15   | 173.27 (15) |
| Al2—O13                                     | 1.812 (3)   | O4—Al2—O16   | 96.61 (18)  |
| Al2—O15                                     | 1.977 (4)   | O7—Al2—O5    | 88.94 (15)  |
| Al2—O16                                     | 1.875 (4)   | O7—Al2—O15   | 82.47 (16)  |
| O1—Al1—O11                                  | 86.92 (13)  | O7—Al2—O16   | 167.80 (18) |
| O1—Al1—O13                                  | 93.42 (13)  | O13—Al2—O4   | 95.30 (14)  |
| O1—Al1—O14                                  | 95.17 (12)  | O13—Al2—O5   | 174.41 (16) |
| O1—Al1—O14i                                 | 170.01 (13) | O13—Al2—O7   | 95.73 (14)  |
| O10—Al1—O1                                  | 94.39 (13)  | O13—Al2—O15  | 90.01 (14)  |
| O10—Al1—O11                                 | 86.50 (12)  | O13—Al2—O16  | 91.05 (15)  |
| O10—Al1—O13                                 | 91.87 (13)  | O15—Al2—O5   | 87.57 (16)  |
| O10—Al1—O14                                 | 167.08 (14) | O16—Al2—O5   | 83.81 (17)  |
| O10—Al1—O14i                                | 92.55 (12)  | O16—Al2—O15  | 87.41 (18)  |
| Symmetry code: (i) $-x+1/2, -y+3/2, -z+1$ . |             |              |             |
| <b>Al<sub>4</sub>-DMA</b>                   |             |              |             |
| Al1—O1                                      | 1.866 (4)   | O14—Al1—O5   | 175.1 (2)   |
| Al1—O2                                      | 1.845 (4)   | O14—Al1—O15  | 92.02 (17)  |
| Al1—O5                                      | 2.039 (4)   | O14—Al1—O16  | 99.17 (19)  |
| Al1—O14                                     | 1.821 (3)   | O15—Al1—O5   | 86.09 (16)  |
| Al1—O15                                     | 1.878 (4)   | O15—Al1—O16  | 84.4 (2)    |
| Al1—O16                                     | 1.900 (5)   | O16—Al1—O5   | 85.19 (18)  |
| Al2—Al2i                                    | 2.896 (3)   | O3—Al2—O9    | 86.44 (13)  |
| Al2—O3                                      | 1.861 (3)   | O3—Al2—O13   | 90.16 (18)  |
| Al2—O4                                      | 1.810 (5)   | O4—Al2—O3    | 93.54 (17)  |
| Al2—O9                                      | 2.234 (3)   | O4—Al2—O9    | 80.37 (17)  |
| Al2—O13i                                    | 1.860 (4)   | O4—Al2—O13i  | 96.01 (17)  |
| Al2—O13                                     | 1.863 (4)   | O4—Al2—O13   | 167.12 (16) |
| Al2—O14                                     | 1.835 (3)   | O4—Al2—O14   | 95.7 (2)    |
| O1—Al1—O5                                   | 88.98 (16)  | O13i—Al2—O3  | 164.12 (19) |

|                                         |             |              |            |
|-----------------------------------------|-------------|--------------|------------|
| O1—Al1—O15                              | 170.8 (2)   | O13—Al2—O9   | 87.57 (17) |
| O1—Al1—O16                              | 87.5 (2)    | O13i—Al2—O9  | 82.69 (13) |
| O2—Al1—O1                               | 94.22 (16)  | O13i—Al2—O13 | 77.88 (18) |
| O2—Al1—O5                               | 84.26 (17)  | O14—Al2—O3   | 98.09 (14) |
| O2—Al1—O15                              | 93.05 (19)  | O14—Al2—O9   | 174.2 (2)  |
| O2—Al1—O16                              | 169.29 (16) | O14—Al2—O13  | 96.00 (19) |
| O14—Al1—O1                              | 93.50 (16)  | O14—Al2—O13i | 93.56 (15) |
| O14—Al1—O2                              | 91.30 (18)  |              |            |
| Symmetry code: (i) $-x+1, -y+1, -z$ .   |             |              |            |
| <b>Al<sub>4</sub>-DMF</b>               |             |              |            |
| Al1—O8                                  | 2.0829 (14) | O11—Al1—O8   | 86.97 (6)  |
| Al1—O11                                 | 1.8367 (15) | O11—Al1—O12  | 91.87 (7)  |
| Al1—O12                                 | 1.8437 (15) | O11—Al1—O14i | 169.93 (7) |
| Al1—O13                                 | 1.8338 (14) | O11—Al1—O16  | 84.65 (7)  |
| Al1—O14i                                | 1.8744 (15) | O12—Al1—O8   | 87.44 (6)  |
| Al1—O16                                 | 1.9169 (16) | O12—Al1—O14i | 91.26 (7)  |
| Al2—O4                                  | 2.0466 (15) | O12—Al1—O16  | 171.59 (7) |
| Al2—O9                                  | 1.8383 (15) | O13—Al1—O8   | 177.14 (6) |
| Al2—O10                                 | 1.8660 (15) | O13—Al1—O11  | 93.30 (6)  |
| Al2—O13                                 | 1.8440 (15) | O13—Al1—O12  | 95.39 (6)  |
| Al2—O14                                 | 1.8801 (15) | O13—Al1—O14i | 95.93 (6)  |
| Al2—O15                                 | 1.9210 (15) | O13—Al1—O16  | 92.46 (6)  |
| O14—Al2—O4                              | 85.95 (6)   | O14i—Al1—O8  | 83.61 (6)  |
| O14—Al2—O15                             | 87.08 (7)   | O14i—Al1—O16 | 90.92 (7)  |
| O15—Al2—O4                              | 85.07 (6)   | O16—Al1—O8   | 84.73 (6)  |
| O13—Al2—O10                             | 92.16 (6)   | O9—Al2—O4    | 87.37 (6)  |
| O13—Al2—O14                             | 95.13 (6)   | O9—Al2—O10   | 93.25 (7)  |
| O13—Al2—O15                             | 93.48 (7)   | O9—Al2—O13   | 94.12 (6)  |
| O10—Al2—O14                             | 171.74 (7)  | O9—Al2—O14   | 90.10 (7)  |
| O10—Al2—O15                             | 88.61 (7)   | O9—Al2—O15   | 172.10 (7) |
| O13—Al2—O4                              | 178.15 (7)  | O10—Al2—O4   | 86.67 (6)  |
| Symmetry code: (i) $-x+1, -y+1, -z+1$ . |             |              |            |
